# Supplementary material for: Quit attempts and tobacco abstinence in primary care patients: follow-up of a pragmatic, two-arm cluster randomised controlled trial on brief stop-smoking advice – ABC versus 5As
Source: PubMed Central journal article supplement — ERJ Open Res. 2021 Jul 26;7(3):00224-2021. doi: 10.1183/23120541.00224-2021 (PMC8311137; doi:10.1183/23120541.00224-2021), 2021-07-26
Supplement: 00224-2021.supplement.pdf [file 00224-2021.supplement.pdf]

**Supplementary Table 1.** Point-prevalence rates of self-reported usage of evidence-based pharmacological and behavioural smoking cessation treatments (multiple answers were allowed) in patients who reported a quit attempt at follow-up weeks 4, 12, and 26 (complete case analysis), stratified by pre-post data collection period.

| Use of evidence-based cessation treatment <sup>#</sup><br>(patient-reported) | Pre-training     |                   |                   | Post-training    |                   |                   |
|------------------------------------------------------------------------------|------------------|-------------------|-------------------|------------------|-------------------|-------------------|
|                                                                              | Week 4<br>(n=75) | Week 12<br>(n=85) | Week 26<br>(n=86) | Week 4<br>(n=59) | Week 12<br>(n=70) | Week 26<br>(n=62) |
| At least one evidence-based cessation method <sup>*</sup>                    | 8.0% (6)         | 14.1% (12)        | 17.4% (15)        | 16.9% (10)       | 11.4% (8)         | 11.3% (7)         |
| Nicotine replacement therapy                                                 | 3.0% (4)         | 11.8% (10)        | 15.1% (13)        | 15.3% (9)        | 8.6% (6)          | 8.1% (5)          |
| Varenicline                                                                  | 3.0% (4)         | 2.4% (2)          | 1.2% (1)          | 0% (0)           | 2.9% (2)          | 1.6% (1)          |
| Bupropion                                                                    | 1.0% (1)         | 0% (0)            | 1.2% (1)          | 0% (0)           | 1.4% (1)          | 0% (0)            |
| Behavioural single/group counselling                                         | 0% (0)           | 1.2 (1)           | 1.2% (1)          | 1.7% (1)         | 1.4% (1)          | 0% (0)            |
| Behavioural telephone counselling (e.g., quit line)                          | 0% (0)           | 0% (0)            | 1.2% (1)          | 0% (0)           | 2.9% (2)          | 1.6% (1)          |

Data are presented as percentages % (n). <sup>#</sup>Evidence-based smoking cessation treatments according to national and international clinical guidelines [2-4]; <sup>\*</sup>patient reported the use of at least one of the evidence-based pharmacological (nicotine replacement therapy, varenicline, bupropion) or behavioural treatments (single or group behavioural counselling, telephone counselling).
